# Supplementary material for: The Disordered Cellular Multi-Tasker WIP and Its Protein–Protein Interactions: A Structural View
Source: PubMed Central journal article supplement (PMC7407642; doi:10.3390/biom10071084), 2020-07-21
Supplement: biomolecules-10-01084-s001.pdf [file biomolecules-10-01084-s001.pdf]

**Table S1: WASp interacting protein binding partners from HIPPIE database.<sup>a</sup>**

| <b>Binding partner</b>                                                 | <b>Acronym</b> | <b>HIPPIE score</b> |
|------------------------------------------------------------------------|----------------|---------------------|
| <b>Cytoplasmic protein NCK1</b>                                        | <b>NCK1</b>    | <b>0.99</b>         |
| <b>Neural Wiskott-Aldrich syndrome protein</b>                         | <b>WASL</b>    | <b>0.99</b>         |
| <b>Wiskott-Aldrich syndrome protein</b>                                | <b>WAS</b>     | <b>0.99</b>         |
| Growth factor receptor-bound protein 2                                 | GRB2           | 0.94                |
| <b>Src substrate cortactin</b>                                         | <b>CTTN</b>    | <b>0.86</b>         |
| Tyrosine-protein kinase HCK                                            | HCK            | 0.85                |
| Cytoplasmic protein NCK2                                               | NCK2           | 0.82                |
| Homer protein homolog 3                                                | HOMER3         | 0.73                |
| WW domain-containing protein 2                                         | WWP2           | 0.73                |
| Transcription elongation factor SPT5                                   | SUPT5H         | 0.72                |
| Amyloid beta A4 precursor protein-binding family B member 1            | APBB1          | 0.68                |
| <b>Hematopoietic lineage cell-specific protein</b>                     | <b>HCLS1</b>   | <b>0.68</b>         |
| Pre-mRNA-processing factor 40 homolog A                                | PRPF40A        | 0.68                |
| WW domain-binding protein 4                                            | WBP4           | 0.68                |
| Abl interactor 2                                                       | ABI2           | 0.63                |
| BAG family molecular chaperone regulator 3                             | BAG3           | 0.63                |
| ELAV-like protein 1                                                    | ELAVL1         | 0.63                |
| Fas-activated serine/threonine kinase                                  | FASTK          | 0.63                |
| Formin binding protein 2/SLIT-ROBO $\rho$ -GTPase-activating protein 2 | SRGAP2         | 0.63                |
| Tyrosine-protein kinase Fyn                                            | FYN            | 0.63                |
| Gigaxonin                                                              | GAN            | 0.63                |
| Hematopoietic protein 1                                                | ALAS1          | 0.63                |
| <b>Intersectin-2</b>                                                   | <b>ITSN2</b>   | <b>0.63</b>         |
| Leucine-rich repeat serine/threonine-protein kinase 2                  | LRRK2          | 0.63                |
| Myc proto-oncogene protein                                             | MYC            | 0.63                |
| Protein kinase C and casein kinase substrate in neurons protein 1      | PACSIN1        | 0.63                |
| Protein kinase C and casein kinase substrate in neurons protein 2      | PACSIN2        | 0.63                |
| Protein kinase C and casein kinase substrate in neurons protein 3      | PACSIN3        | 0.63                |
| Proline-serine-threonine phosphatase-interacting protein 1             | PSTPIP1        | 0.63                |
| Roundabout homolog 4                                                   | ROBO4          | 0.63                |
| Protein transport protein Sec24C                                       | SEC24C         | 0.63                |
| SH3 domain-containing kinase-binding protein 1                         | SH3KBP1        | 0.63                |
| E3 ubiquitin-protein ligase SH3RF1                                     | SH3RF1         | 0.63                |
| Actin, alpha cardiac muscle 1                                          | ACTC1          | 0.62                |
| <b>Actin, cytoplasmic 2</b>                                            | <b>ACTG1</b>   | <b>0.56</b>         |
| Cell division control protein 42 homolog                               | CDC42          | 0.56                |
| <b>Crk-like protein</b>                                                | <b>CRKL</b>    | <b>0.55</b>         |
| Protein kinase C theta type                                            | PRKCQ          | 0.52                |
| Tyrosine-protein kinase ZAP-70                                         | ZAP70          | 0.52                |

<sup>a</sup> Proteins in bold are WIP binding partners mentioned in this review in their structural context
